# Supplementary material for: Seeing the invisible: XRF reveals lead distributions in coral organisms grown in the Red Sea (Gulf of Aqaba)
Source: Royal Society of Chemistry journal article supplement (doi:10.1039/d5fd00024f), 2025-01-01
Supplement: d5fd00024f1.pdf [file d5fd00024f1.pdf]

## Supplementary information

### Seeing the invisible: XRF reveals lead distributions in coral organisms grown in the Red Sea (Gulf of Aqaba)

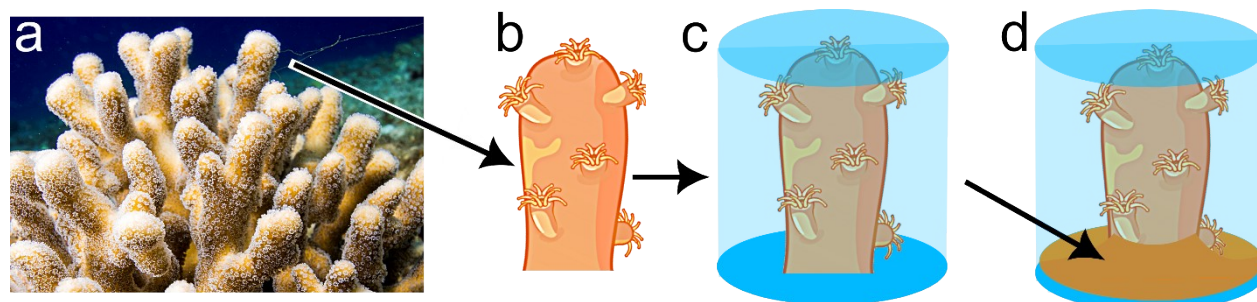

**SI Figure 1: Preparation of coral nubbin samples.** (a) Representative coral branches of the *Stylophora pistillata* genotype from a depth of 5 m near the Interuniversity Institute for Marine Science (IUI) at the Gulf of Eilat, northern Red Sea (29 °30' N, 34 °56' E). (b) Coral fragments (~1 cm) were harvested and (c) secured with superglue to the inner surface of PMMA cylinders (~1.5 cm diameter). (d) Over a 1-month period within a flow-through seawater system (not depicted), the corals adapted, forming new tissue and skeleton at the cylinder bases (indicated by black arrows). The nubbins recovered and expanded, eventually covering the entire base of the cylinders.
